# Removing unwanted variation between samples in Hi-C experiments

Kipper Fletez-Brant<sup>1,2</sup>, Yunjiang Qiu<sup>3,4</sup>, David U. Gorkin<sup>4,5</sup>, Ming Hu<sup>6</sup>, and Kasper D. Hansen<sup>1,2,\*</sup>

<sup>1</sup>McKusick-Nathans Institute of Genetic Medicine, Johns Hopkins School of Medicine

<sup>2</sup>Department of Biostatistics, Johns Hopkins Bloomberg School of Public Health

<sup>3</sup>Bioinformatics and Systems Biology Graduate Program, University of California, San Diego

<sup>4</sup>Ludwig Institute for Cancer Research

<sup>5</sup>Department of Cellular and Molecular Medicine, University of California at San Diego

<sup>6</sup>Department of Quantitative Health Sciences, Lerner Research Institute, Cleveland Clinic Foundation

\*Correspondence: [khansen@jhsp.hopkins.edu](mailto:khansen@jhsp.hopkins.edu)

## Abstract

Hi-C data is commonly normalized using single sample processing methods, with focus on comparisons between regions within a given contact map. Here, we aim to compare contact maps across different samples. We demonstrate that unwanted variation, of likely technical origin, is present in Hi-C data with replicates from different individuals, and that properties of this unwanted variation changes across the contact map. We present BNBC, a method for normalization and batch correction of Hi-C data and show that it substantially improves comparisons across samples.

## Introduction

The Hi-C assay allows for genome-wide measurements of chromatin interactions between different genomic regions (Lieberman-Aiden et al., 2009; Wit, Laatz, 2012; Dekker et al., 2013; Schmitt et al., 2016; Davies et al., 2017). The use of Hi-C has revealed that the genome is organized in structures at different resolutions such as A/B compartments (Lieberman-Aiden et al., 2009), topologically associated domains (TADs) (Dixon et al., 2012; Nora et al., 2012; Sexton et al., 2012) and loops (Rao et al., 2014). Partly because of the high cost of the assay, the role of inter-personal variation in 3D genome structure is largely unexplored, with the exception of our recent work (Gorkin et al., 2019).

In addition to large-scale structures such as TADs and A/B compartments, there is substantial interest in using Hi-C data to measure specific interactions such as those occurring between regulatory elements and their associated promoters. These interactions are represented as individual cells in the Hi-C contact matrix. Such regulatory interactions do not occur at all distances; an example is enhancer-promoter contacts, which are thought

to occur primarily within 1 Mb (Vernimmen, Bickmore, 2015). Methods for detecting such interactions include Fit-HiC (Ay et al., 2014) and HiC-DC (Carty et al., 2017); these methods compare specific contact cells to a background distribution.

Variation and noise in a Hi-C experiment can differ between resolutions and between different types of structures. For example, A/B compartments are estimated using an Eigen decomposition of a suitably normalized contact matrix. We have previously (Fortin, Hansen, 2015) found little-to-no differences between A/B compartments estimated using data from a 1 Mb resolution dilution Hi-C experiment (Lieberman-Aiden et al., 2009) and a 1 Kb resolution in-situ Hi-C experiment on the same cell line (Rao et al., 2014). This observation is specific to A/B compartments; the two experiments differ dramatically in terms of resolution and ability to estimate many other types of structures including TADs and loops.

Hi-C data, like all types of genomic data, suffers from systematic noise and bias. To address this, a number of within-sample normalization methods have been developed. Some of these methods explicitly model sources of unwanted variation, such as GC content of interaction loci, fragment length, mappability and copy number (Yaffe, Tanay, 2011; Hu et al., 2012; Vidal et al., 2018). Other methods are agnostic to sources of bias and attempt to balance the marginal distribution of contacts (Imakaev et al., 2012; Knight, Ruiz, 2013; Rao et al., 2014; Yan et al., 2017). A comparison of some of these methods found high correlation between their correction factors (Rao et al., 2014).

When comparing genomic data *between* samples, variation can arise from numerous sources that do not reflect the biology of interest including sample procurement, sample storage, library preparation, and sequencing. We refer to these sources of variation as “unwanted” here,

**Table 1. Sample information**

| Sample  | Replicate | Ethnicity | Sex | Family | Role   | Batch | Prep date | SCC   |
|---------|-----------|-----------|-----|--------|--------|-------|-----------|-------|
| HG00512 | 1         | CHS       | M   | 2      | Father | 1     | 3/4/15    | 0.923 |
| HG00512 | 2         | CHS       | M   | 2      | Father | 2     | 5/28/15   |       |
| HG00513 | 1         | CHS       | F   | 2      | Mother | 1     | 3/4/15    | 0.961 |
| HG00513 | 2         | CHS       | F   | 2      | Mother | 2     | 5/28/15   |       |
| HG00514 | 1         | CHS       | F   | 2      | Child  | 1     | 3/4/15    | 0.967 |
| HG00514 | 2         | CHS       | F   | 2      | Child  | 2     | 5/28/15   |       |
| HG00731 | 1         | PUR       | M   | 3      | Father | 1     | 3/4/15    | 0.963 |
| HG00731 | 2         | PUR       | M   | 3      | Father | 2     | 5/28/15   |       |
| HG00732 | 1         | PUR       | F   | 3      | Mother | 1     | 3/4/15    | 0.956 |
| HG00732 | 2         | PUR       | F   | 3      | Mother | 2     | 5/28/15   |       |
| HG00733 | 1         | PUR       | F   | 3      | Child  | 1     | 3/4/15    | 0.971 |
| HG00733 | 2         | PUR       | F   | 3      | Child  | 2     | 5/28/15   |       |
| GM19238 | 1         | YRI       | F   | 1      | Mother | 3     | 9/26/14   | 0.973 |
| GM19238 | 2         | YRI       | F   | 1      | Mother | 3     | 9/26/14   |       |
| GM19239 | 2         | YRI       | M   | 1      | Father | 3     | 9/26/14   | N/A   |

because they obscure the underlying biology that is of interest when performing a between-sample comparison. It is critical to correct for this unwanted variation in analysis (Leek, Scharpf, et al., 2010). A number of tools and extensions have been successful at this, particularly for analysis of gene expression data (Leek, Storey, 2007; Leek, Storey, 2008; Gagnon-Bartsch, Speed, 2012; Johnson et al., 2007; Stegle et al., 2010; Leek, 2014; Risso et al., 2014). Most existing normalization methods for Hi-C data are single sample methods, focused on comparisons between different loci in the genome.

Three existing methods have considered between-sample normalization in the context of a differential comparison (Lun, Smyth, 2015; Stansfield, Cresswell, Vladimirov, et al., 2018; Stansfield, Cresswell, Dozmorov, 2019), all can be viewed as an adaption of the idea of loess normalization from gene expression microarrays (YH Yang et al., 2002). In these methods, the estimated fold-change between conditions are modeled using a loess smoother as a function of either average contact strength (Lun, Smyth, 2015) or distance between loci (Stansfield, Cresswell, Vladimirov, et al., 2018; Stansfield, Cresswell, Dozmorov, 2019). Using the loess estimates, the data are corrected so there is no effect of the covariate on the fold-change.

## Results

### High-quality Hi-C experiments on different individuals

To investigate the variation between Hi-C data generated from individuals with different genetics, we use existing dilution Hi-C data from lymphoblastoid cell lines generated from 8 different individuals (including 2 trios) from the HapMap project (International HapMap Consortium, 2003) (Table 1). The individuals cover 3 popula-

tions (Yoruba, Han Chinese and Puerto Rico). For each individual, data was generated from two cultures of the same cell line grown separately for at least 2 passages, and more than 500 million mapped reads were generated for each individual (Table 2); at least 250 million reads for each growth replicate. The reads were summarized at a resolution of 40 kb.

Quality control using recently developed guidelines (Yardımcı et al., 2019) suggests that our data is of high quality. In support of this conclusion, we used HiCRep to compute stratum adjusted correlation coefficients (SCCs) between replicates of the same cell line (T Yang et al., 2017). This shows a minimal between-growth-replicate SCC of 0.92 with a mean of 0.96, comfortably exceeding the values recommended by Yardımcı et al. (2019).

### Experimental design and replication

We use lymphoblastoid cell lines from the HapMap project (International HapMap Consortium, 2003), because these cell lines have been a widely used model system to study inter-individual variation and genetic mechanisms in numerous molecular phenotypes including gene expression, chromatin accessibility, histone modification, and DNA methylation (Stranger et al., 2007; Pickrell et al., 2010; Montgomery et al., 2010; Degner et al., 2012; Kasowski et al., 2013; McVicker et al., 2013; Kilpinen et al., 2013; Bell et al., 2011). It has been established that phenotypic differences, which are unlikely to be explained by genetics, exists between lymphoblastoid cell lines from different HapMap populations (Stark et al., 2010; Choy et al., 2008; Stranger et al., 2007). These differences might be related to cell line creation and division (Stark et al., 2010). In our experimental design, experimental batch (library preparation) is partly confounded by cell line population (Table 1), because batch

**Table 2. Mapping statistics**

| Sample  | Replicate | Total Reads | Cis         | Cis (Long)  | Trans       |
|---------|-----------|-------------|-------------|-------------|-------------|
| GM19238 | 1         | 545,759,860 | 302,092,644 | 230,613,702 | 243,667,216 |
| GM19238 | 2         | 314,967,258 | 185,913,678 | 145,343,000 | 129,053,580 |
| GM19239 | 2         | 553,838,876 | 367,216,970 | 287,593,654 | 186,621,906 |
| HG00512 | 1         | 311,906,326 | 139,566,774 | 94,984,622  | 172,339,552 |
| HG00512 | 2         | 270,228,888 | 152,292,628 | 114,914,390 | 117,936,260 |
| HG00513 | 1         | 371,772,886 | 174,783,850 | 125,704,946 | 196,989,036 |
| HG00513 | 2         | 277,954,128 | 161,423,552 | 122,711,298 | 116,530,576 |
| HG00514 | 1         | 354,765,444 | 210,846,240 | 103,777,676 | 143,919,204 |
| HG00514 | 2         | 266,032,734 | 177,325,378 | 100,665,340 | 88,707,356  |
| HG00731 | 1         | 324,496,352 | 173,380,026 | 105,098,564 | 151,116,326 |
| HG00731 | 2         | 266,661,686 | 151,763,346 | 99,399,932  | 114,898,340 |
| HG00732 | 1         | 419,151,786 | 237,460,978 | 117,332,062 | 181,690,808 |
| HG00732 | 2         | 291,561,824 | 176,279,418 | 99,373,490  | 115,282,406 |
| HG00733 | 1         | 356,662,684 | 185,558,600 | 112,732,352 | 171,104,084 |
| HG00733 | 2         | 293,167,014 | 178,562,640 | 100,250,886 | 114,604,374 |

3 consists solely of samples from the Yoruban population whereas batch 1 and 2 contain one growth replicate each from the samples from the Han Chinese and Puerto Rican populations. In addition, batch 1 and 2 were prepared closer together in time (within 3 months) compared to batch 3 (6 months earlier).

The literature on Hi-C data frequently refers to “biological replicates”, but the definition of this term varies. For example, the ENCODE Terms and Definitions (<https://www.encodeproject.org/data-standards/terms/>) defines a biological replicate as the same experiment performed on different biosamples, an example is different growths of the same cell line. In contrast, Rao et al. (2014) defines biological replicates to be cells which were not cross-linked together; this is looser than the ENCODE definition. In the literature on population level variation in genomic measurements, biological replicates usually refers to replicates from distinct individuals such as different people or different mice. To avoid confusion in the present manuscript, we will use the term “individual replicate” to refer to a replicate experiment performed on lymphoblastoid cells lines created from two distinct individuals. And we will use the term “growth replicate” to refer to a replicate experiment on a different growth of the same cell line – this is what is commonly referred to as a “biological replicate” in the Hi-C literature.

### Unwanted variation in Hi-C data varies between distance stratum

It is well described that a Hi-C contact map exhibits an exponential decay in signal as the distance between loci increases (Lieberman-Aiden et al., 2009). When we quantify this behavior across growth and individual replicates, we observe substantial variation in the decay rate from sample to sample (Figure 1). The data pre-

sented in Figure 1 is normalized using iterative correction and Eigenvalue decomposition (ICE) and corrected for library size using the log counts per million transformation (Methods). It appears that samples from batch 3 (Yorubans) are especially different from the other two batches. We note that nothing from our quality control analysis suggests that samples from batch 3 have either lower or higher quality.

In molecular profiling, we frequently observe substantial technical variation in the data. This variation is often associated with experimental batch and has been termed “batch effects” (Leek, Scharpf, et al., 2010). Later, Gagnon-Bartsch, Speed (2012) introduced the more general term “unwanted variation”. What is considered unwanted variation is study specific, and can include stochastic variation, technical variation at the level of sample collection, technical variation at the level of library preparation, and also biological variation of no interest. As an example of the later, in molecular profiling of tissues (but not cell lines as studied here), variation in cell type composition is frequently considered unwanted, but is sometimes the subject of interest. We refer to all of these sources of variation which can obscure the biological differences of interest, as “unwanted variation”.

To assess unwanted variation beyond changes in the mean, we represented our data as a set of matrices indexed by genomic distance (Figure 1). Each matrix contains all contacts between loci at a fixed genomic distance for all samples (Methods). We call this a band transformation, since these contacts form diagonal bands in the original Hi-C contact matrices. For each band, we observe substantial variation in the distribution of contacts between samples, Figure 1 depicts the distributions for three selected bands at close (40 kb), medium (2 Mb) and long (8 Mb) ranges. Besides changes in the mean between samples, we observe changes in

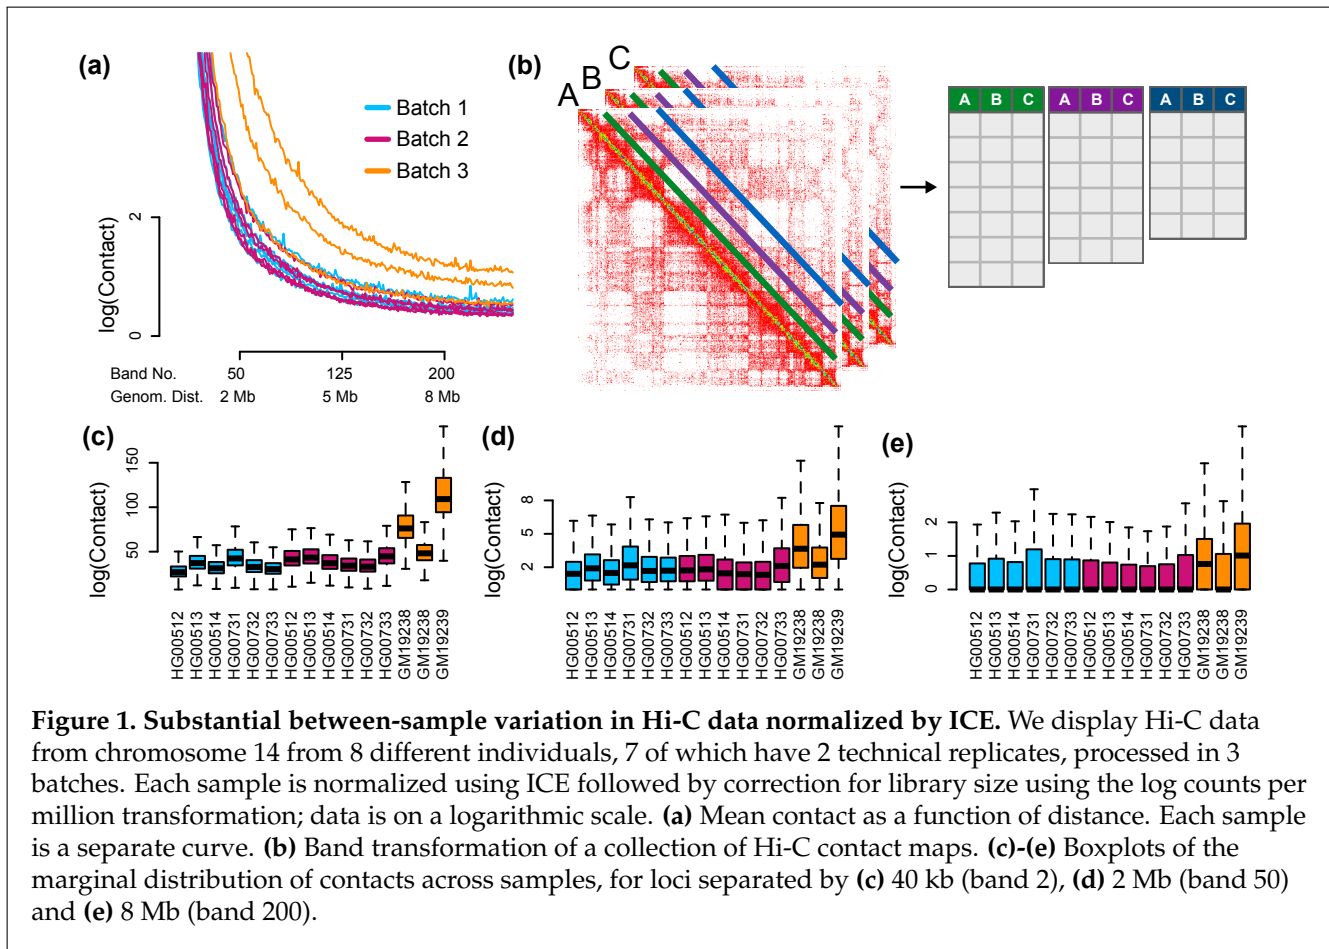

the variance. Again batch 3 appears to be more different from the other 2 batches, although we do see variation between growth replicates between batches. Note that not all contact distances are treated equally when interpreting Hi-C data: one goal of Hi-C experiments is to identify enhancer-promoter contacts, which are thought to occur primarily with 1 Mb (Vernimmen, Bickmore, 2015).

To quantify the impact of unwanted variation on our Hi-C data, we first asked, for each entry in the contact matrix, how much variation is explained by the experimental batch factor? We measure the amount of explained variation using  $R^2$  from a linear mixed effects model with a random effect to model the increased correlation between growth replicates (Methods). We observe an association between explained variation and distance between loci (Figure 2), with an average  $R^2$  value of 0.32. This means that 32% of the between-sample variation in the individual entries in the contact matrix is explained by experimental batch, which is partly confounded with population (explored further below). This shows that the effect of the experimental batch factor changes with distance and is substantial.

To further explore the effect of batch, we performed principal component analysis on each of the band matrices

and computed Spearman correlation between each of the first four principal components and the batch indicator (Figure 2). This is a common technique to assess if the major sources of variation in a matrix is associated with a known covariate, here the experimental batch factor. This supports the conclusion of our  $R^2$  analysis and emphasizes the dynamic nature of the association between variability and the experimental batch factor.

These observations hold roughly across a variety of standard Hi-C normalization methods. This is perhaps most succinctly summarized by the plots of  $R^2$  stratified by distance. Figure 3 shows the percent variance explained by the batch factor for data without normalization and data normalized using HiCNorm (Hu et al., 2012). By comparing the percent variance explained without normalization to data normalized using either ICE or HiCNorm, we observe that both methods increase the amount of unwanted variation between samples. This is likely a consequence of the fact that both methods are single-sample normalization methods and are designed to facilitate comparison between different loci and not between different samples.

In these analyses we are focusing on the variation across individuals of specific entries in the contact matrices. We emphasize that this is different from variation in



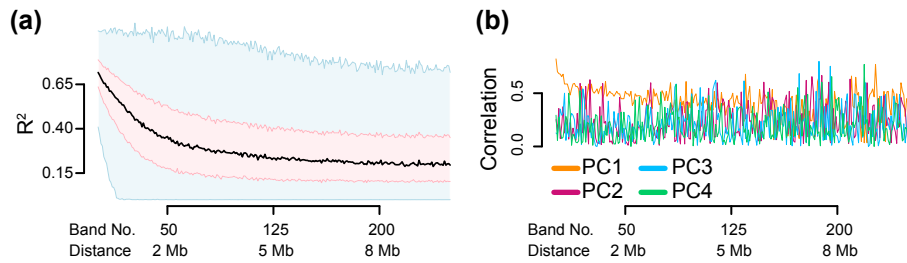

**Figure 2. Unwanted variation in Hi-C data normalized by ICE.** Data has been normalized using ICE (as in Figure 1) (a) The percentage of variation explained ( $R^2$ ) in a linear mixed effect model with library preparation as explanatory variable. (b) The Spearman correlation of the library preparation factor with each of the first 4 principal components of each band matrix.

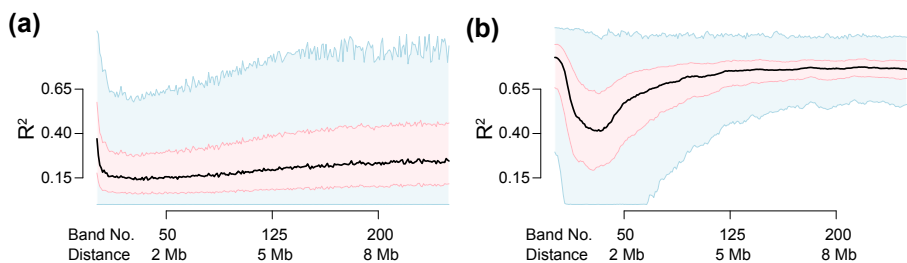

**Figure 3. Unwanted variation and preprocessing method.** Like Figure 2a, but using different data preprocessing. (a) Hi-C data without any normalization. (b) Hi-C data normalized using HiCNorm.

other structures such as TADs, A/B compartments etc (see Discussion).

### Observed-expected normalization between samples

Observed-expected normalization was introduced by Lieberman-Aiden et al. (2009); it consists of dividing all contact cells in a given band by the mean contact across the band. This is an example of scale normalization, and was introduced as a *within-sample* normalization technique. In light of the differences in decay rates across samples (Figure 1), it is natural to force the decay rates to be the same. Observed-expected normalization is an easy approach to this, since it removes the decay and hence forces different samples to have the same (non-existing) decay rate. To keep the fast decay rate in the data, we suggest multiplying the band matrices by the average decay rate (Methods). The choice of common decay rate does not impact our assessment of unwanted variation since it is the same scale applied to each sample and both  $R^2$  and Spearman correlation is invariant to a common scale transformation. This is a natural adaptation of observed-expected normalization to a *between-samples* approach, and we refer to this method as ICE-OE.

Using ICE-OE leads to an improvement over ICE normalization alone (Figure 4). Per design, there is no be-

tween sample variation in the contact decay rate. Box-plots of the contact distribution for selected bands still show sample-specific variance. More important, we no longer observe any dependence of  $R^2$  on band, and the average  $R^2$  is at the level of the smallest  $R^2$  for ICE normalized data (ie. 0.15). While the  $R^2$  is smaller than for ICE normalized data alone, we note that, for each distance band, 25% of the contact cells still have an  $R^2$  of 0.3 or greater. The correlation between principal components and the batch factor is slightly smaller compared to ICE only normalization. With these assessments, ICE-OE appears to have addressed many of the major deficiencies associated with ICE.

### The separate impact of library preparation and cell line creation

It is interesting to consider the source of the unwanted variation. To investigate this, we restricted our analysis to samples from the Han Chinese and Puerto Rican populations since – for these samples – each growth replicate was prepared twice in two different batches (Table 1). This results in a balanced experiment, making it easy to separate the contribution of these two factors.

Using the  $R^2$  approach described above, we can compute  $R^2$  for a model only including population (cell line creation) and a model only including library prepara-

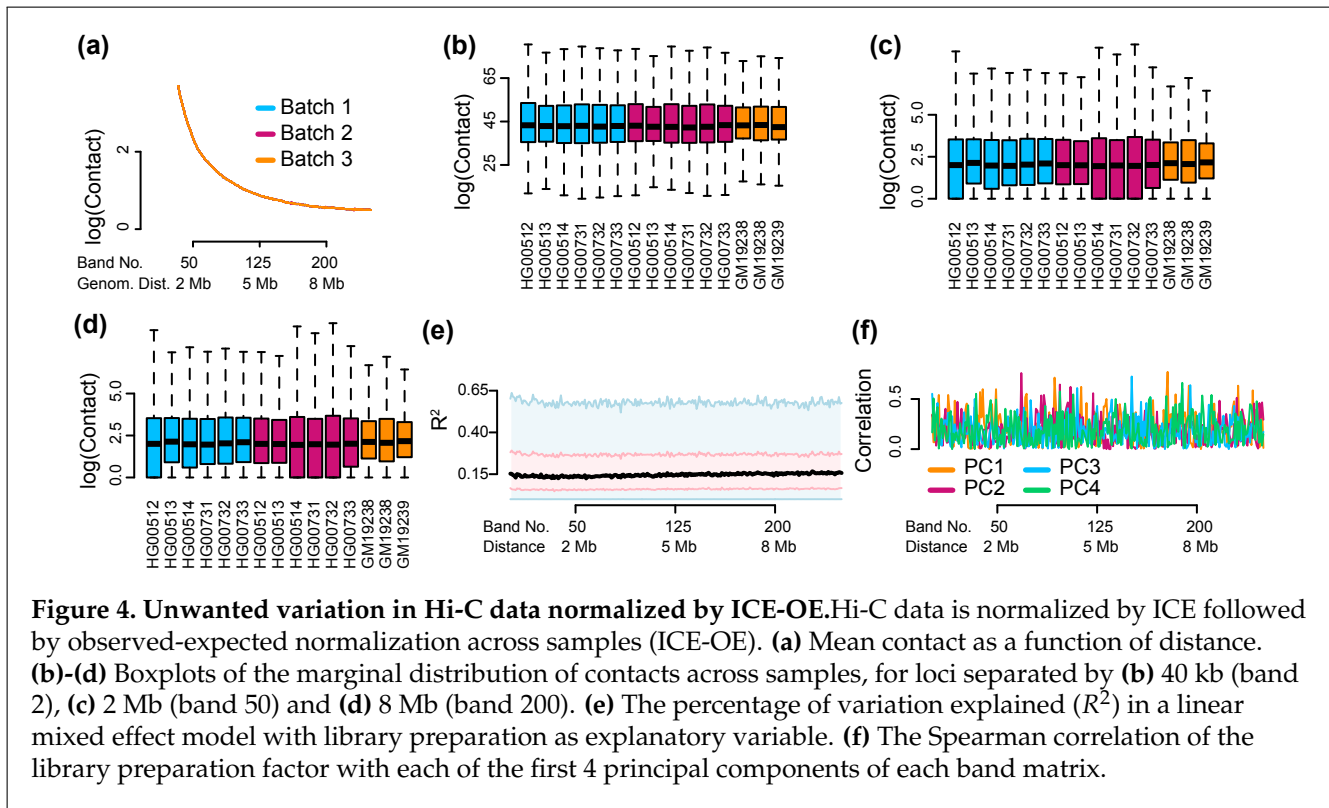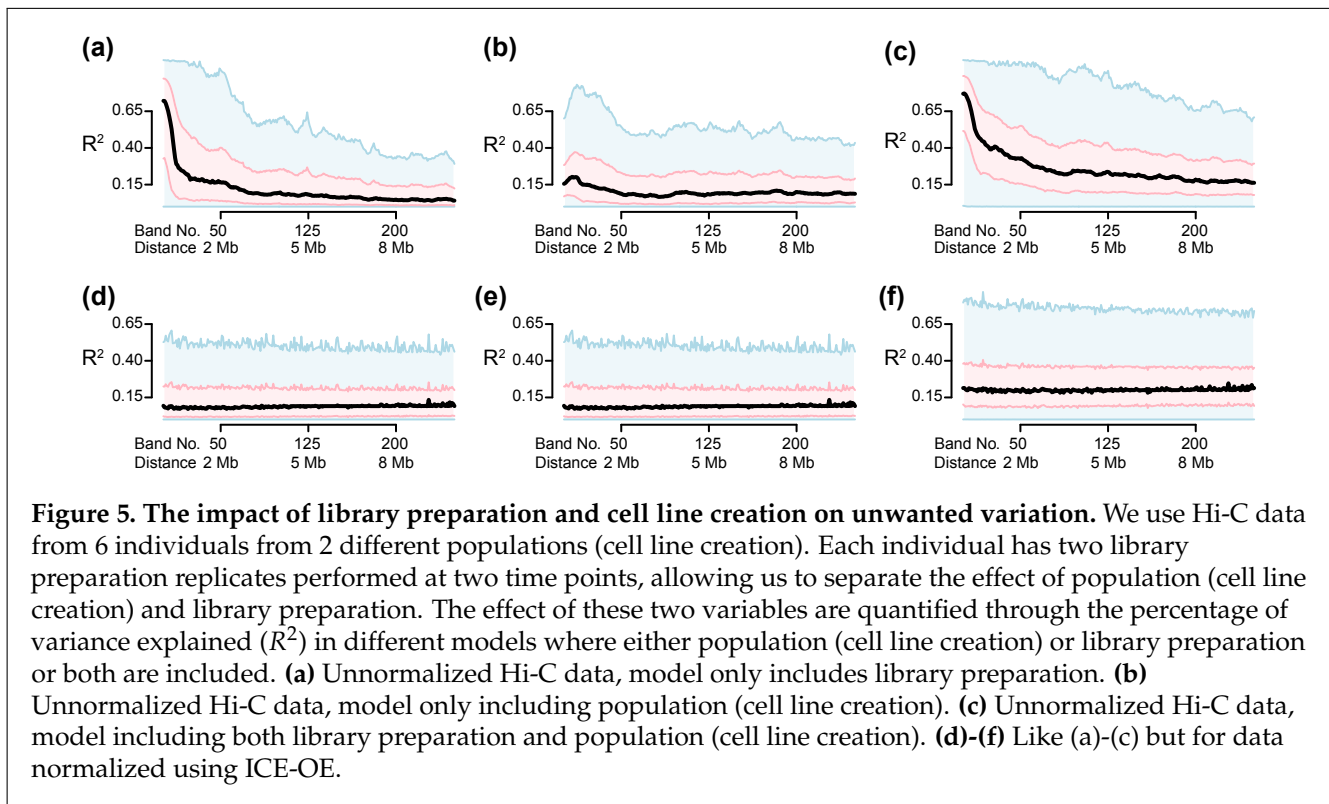

tion. These two sets of explained variation are comparable because the data is unchanged and the explanatory variable has the same dimension with the same number

of replicates assigned to each level. We can also compute  $R^2$  for a model containing both factors; mathematically this is guaranteed to be higher than  $R^2$  for either factor

separately. We do this both for unnormalized data and for data processed using ICE-OE. In Figure 5, we observe that library preparation explains slightly higher variation compared to population. For the unnormalized data, there is substantial variation of the effect of library preparation in different bands, which goes away after the observed-expected normalization. We also observe that the two factors appear to combine independently, in that including both factors in a model raises  $R^2$  substantially above either of the two factors alone. We conclude that library preparation explains at least as much variation as cell line creation, and possibly more.

Previously, we noted that batch 3 appeared to be more variable than batch 1 and 2. However, here we restrict our analysis to only these later batches and observe a similar percentage of variance explained by batch. This shows that our results above are not just driven by batch 3.

### ICE-OE is unsuitable for genetic mapping

An interesting biological question, which can only be addressed with data on individual replicates, is the association between genetic variation and 3D structure. This question can be asked for any type of 3D structure including TADs and loops. Here we focus on variation in individual contact cells, which is interesting because of the relationship between regulatory elements and the genes they regulate. Specifically we are interested in performing a quantitative trait loci (QTL) mapping for each contact cell. A QTL mapping is simply asking, for each contact cell, whether there is an association with a nearby single nucleotide variant (SNP). An advantage of QTL mapping is that we have well-established quality control procedures which can help reveal whether a data matrix has been properly normalized.

For our QTL mapping we consider all contact cells representing loci separated by less than 1 Mb. For testing against a given contact cell, we require a candidate SNP to be present in one of the two anchor bins for that contact cell (Figure 6a, Methods). We furthermore require that all genotypes are represented in our samples (Methods). These requirements yield a total of 22,541 SNPs for 21,017 contact cells on chromosome 22, representing 1,111,407 tests. We use a linear mixed effect model with a random effect on the growth replicate, to model the increased correlation between growth replicates.

In Figure 6 we depict a quantile-quantile plot (QQ-plot) for the (minus logarithmic) p-values for this analysis, as well as histograms of the p-value distribution. We observe that the QQ-plots for both ICE and ICE-OE normalized data look unsatisfactory with an unusual discrepancy from expectation (parallel with the  $y = x$  line with a deviation towards the end). Furthermore, the p-value histograms are also strongly deviating from the expected behaviour of being flat with a possible bump near zero. We stress that the lack of small p-values re-

vealed by the histogram is not caused by lack of power due to small sample size; this would result in a flat histogram. Unlike the previous assessment, here there is only a small impact of observed-expected normalization after ICE. We conclude that neither ICE nor ICE-OE properly normalize the data for a QTL analysis.

### Band-wise normalization and batch correction

To normalize the data and remove unwanted variation for a QTL analysis, we used the band transformation framework. We propose to separately smooth each contact matrix, apply the band transformation, quantile normalize each bandmatrix, followed by using ComBat with a known batch effect factor. We call this approach band-wise normalization and batch correction (BNBC). We next describe our rationale for each step.

We start by following existing work by T Yang et al. (2017) and smooth the sample-specific contact matrices, since doing so results in increased correlation between growth replicates (confirmed by us). We note that the HiC-Rep criteria does not include consideration of biological signal and we caution that such signal could be diminished. For example, in work on normalization of DNA methylation arrays, we found that methods which performs best at reducing technical variation do not necessarily perform best when the assessment is replication of biological signal (Fortin, Labbe, et al., 2014). For these reasons we consider smoothing an optional part of BNBC and our software makes it easy to disable.

We next process each smoothed matrix band, from all samples, one at a time. We perform quantile normalization on each matrix band. Quantile normalization forces the marginal distributions of each sample to be the same, ie. the distributions displayed in Figure 2c. This reduces inter-sample variability, but operates under an assumption that the genome-wide distribution of contacts at a given distance, is the same across samples. This assumption is in our view uncontroversial for our lymphoblastoid cell lines. Quantile normalization can be disabled in our software.

We then use ComBat (Johnson et al., 2007) to remove the effect of batch in each band matrix separately. ComBat removes the effect of batch on both the location (mean) of a given Hi-C matrix cell's observations across samples, as well as the scale (variance). In comparison, regressing out the batch factor using a standard linear model would only remove the effect of batch on location (mean). Moreover, ComBat uses Empirical Bayes methods to regularize estimates of batch effects, resulting in more stable estimates, particular in the small-sample setting. In this approach it is important to condition on distance because the exponential decay of the contact matrices would make contact cells from different bands incomparable.

BNBC is highly scalable because we only process one matrix band at a time. The largest band – the diagonal –

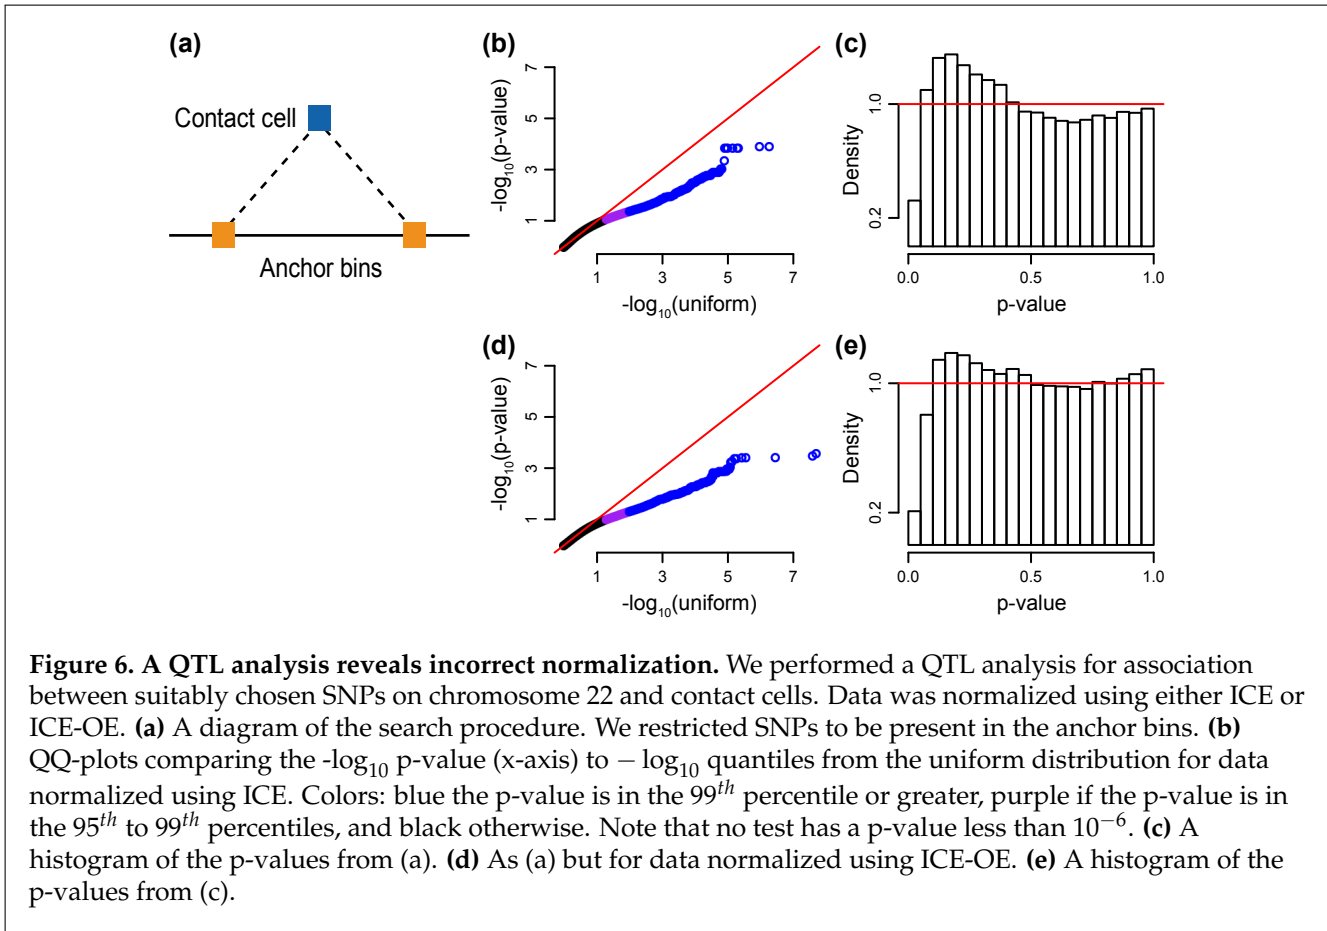

has a number of entries equal to the number of bins in the genome, and this size scales linearly with resolution. A 1kb resolution Hi-C experiment has 3M entries in its diagonal, resulting in a band matrix with 3M rows and columns equal to the number of samples. While big, this can be processed on a laptop. We provide an implementation supporting the cooler format (Abdennur, Mirny, 2019).

BNBC removes any between sample difference in decay rate and also stabilizes band-specific variances across samples (Figure 7). To assess the impact of BNBC, we again measured the variation explained by the batch factor. We observe a decrease in this quantity compared to ICE-OE, including at the 75%-quantile level (Figures 7, 4). Likewise, we observe a dramatic decrease in correlation between principal components and the batch factor.

While seemingly impressive, we note that the decrease in  $R^2$  and the lack of correlation with principal components are mathematical consequences of the use of regression in ComBat. This is because simply regressing out a factor from each of the entries in a band matrix, ensures that both  $R^2$  for that factor as well as the correlation between factor and each of the principal components of the data matrix is equal to zero. ComBat does more than simply regressing out batch – it uses Empirical Bayes techniques to shrink the parameters and it also

models changes in variation – and this explains why the observed  $R^2$  and the correlations are not exactly 0. For this reason, we caution against the use of these evaluation criteria for assessing the performance of BNBC. The assessment of non-regression based techniques, like ICE and ICE-OE, is not impacted by this comment.

We next investigated the impact of BNBC on the contact map. There is little difference between the contact map following ICE normalization and BNBC normalization (Figure 8). The same is true for the associated first Eigenvector, which is commonly used to identify A/B compartments (Figure 8). We conclude that BNBC does not distort gross features of the contact map.

We now consider the impact of BNBC on genetic mapping. Using the same measures as described above, we observe a uniform distribution of p-values as well as a much better behaved QQ-plot for the p-values (Figure 9). Multiple observed p-values are less than  $10^{-6}$  (we do more than 1M tests), comfortably exceeding the lowest p-value following ICE or ICE-OE (which is around  $10^{-4}$ , Figure 6), suggesting that BNBC not only corrects issues with under-inflation of the test statistic, but also increases power. We conclude that BNBC noticeably improves on ICE and ICE-OE for genetic mapping.



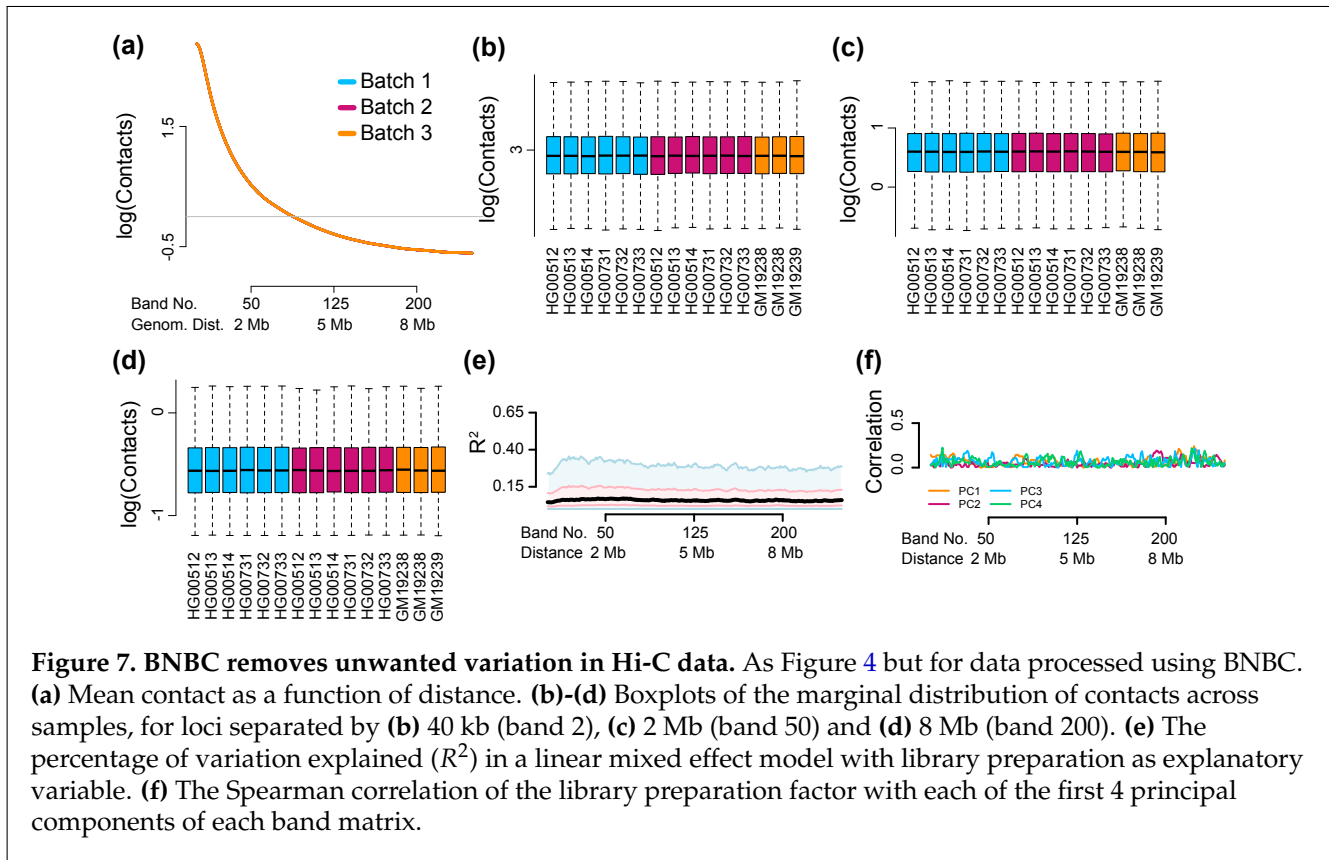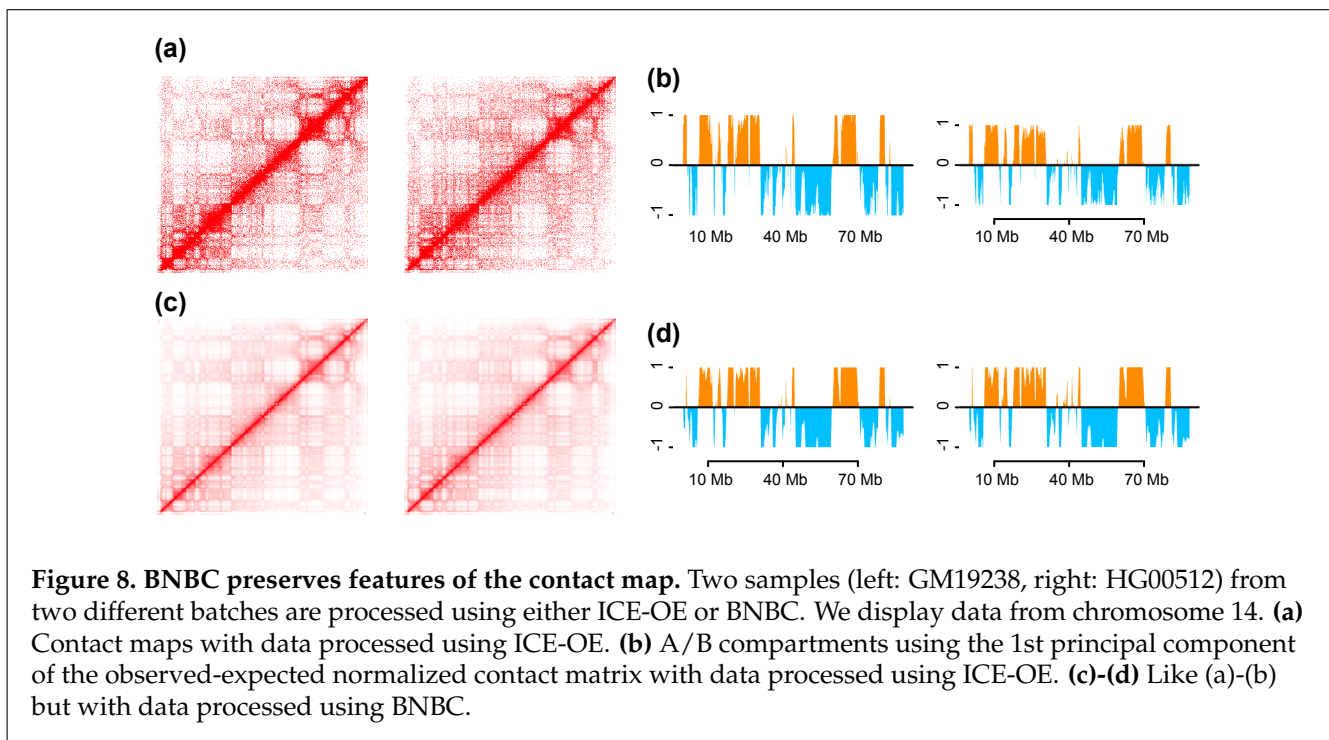

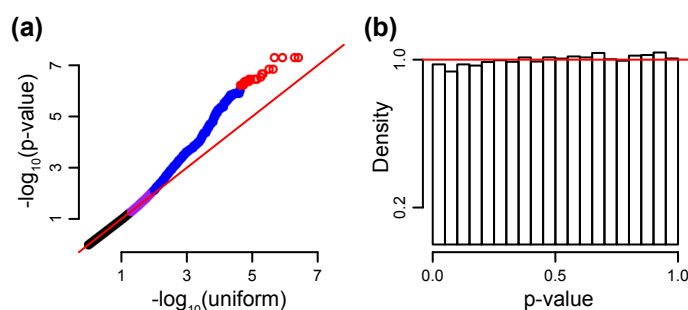

**Figure 9. BNBC normalizes data for QTL analysis.** Like Figure 6 but for data normalized using BNBC. (a) QQ plots comparing the  $-\log_{10}$  p-value (x-axis) to  $-\log_{10}$  quantiles from the uniform distribution. Colors: red if the p-value is less than  $10^{-6}$ , blue if the p-value is in 99<sup>th</sup> percentile or greater, purple if the p-value is in the 95<sup>th</sup> to 99<sup>th</sup> percentiles, and black otherwise. (b) A histogram of the p-values from (a).

## Discussion

Here, we have characterized unwanted variation present in Hi-C contact maps and have developed a correction method named band-wise normalization and batch correction (BNBC). We show the existence of unwanted variation in Hi-C data and show that on average, experimental batch explains 32% of the between-sample variation in contact cells for ICE normalized data, in the 40kb dilution Hi-C experiment analyzed here. We show unwanted variation exhibits a distance-dependent effect, in addition to known distance-based features of Hi-C contact maps. A simple combination of ICE and observed-expected normalization adapted to a between-sample normalization method corrects several of these deficiencies; we call this approach ICE-OE. We show that both ICE and ICE-OE has serious deficiencies when used for genetic mapping.

We present BNBC, a modular approach where we combine band transformation with existing tools for normalization and removal of unwanted variation for between-sample comparisons. This is not a method suitable if the intention is to pool data from different replicates into a single contact matrix. We show that BNBC performs well in reducing the impact of unwanted variation while still preserving important 3D features, such as the structure of the contact map and A/B compartments. Data processed using BNBC shows dramatic improvement when used for genetic mapping.

A limitation of our method is the requirement for an explicit batch factor, caused by the use of ComBat. For gene expression analysis, models based on factor analysis such as RUV (Gagnon-Bartsch, Speed, 2012; Risso et al., 2014) or SVA (Leek, Storey, 2007; Leek, Storey, 2008; Leek, 2014) do not have this limitation and has shown outstanding performance. It will be useful to adapt such approaches to Hi-C data analysis. As always, it is important that the experimental setup (a possible batch factor)

does not confound the comparison of interest.

As a by-product of both ICE-OE and BNBC we force the decay in contact probabilities over distance to be the same across samples. Haarhuis et al. (2017) reports that knockdown of WAPL in HAP1 cells results in changes in the contact decay probability. However, we show in our work that replicates can have quite different decay rates, which suggests that one should be careful before making claims about changes in decay rate. If decay rates are different across samples, forcing them to be similar will remove some biological signal and care should be taken with analysis.

We emphasize that our analysis of unwanted variation is about variation at the level of individual contact cells. The amount of unwanted variation can depend on the type of structure of interest such as TADs or loops. It is not self-evident that using BNBC on the contact matrix is suitable for normalizing TADs or loops for comparisons across samples; this question is not examined in our work.

In summary, proper normalization and correction for unwanted variation will be critical for comparing Hi-C contact maps between different samples.

## Methods

### Data Generation

**Hi-C experiments:** Lymphoblast Hi-C data analyzed were generated by the dilution Hi-C method using HindIII (Lieberman-Aiden et al., 2009) on 9 lymphoblastoid cell lines derived from the 1000 Genomes project (Table 1). Data are publicly available through 1000 genomes (Chaisson et al., 2019) as well as through the 4D Nucleome data portal (<https://data.4dnucleome.org>; accessions 4DNESYUYFD6H, 4DNESVKLYDOH, 4DNESHGL976U, 4DNESJ1VX52C, 4DNESI2UKI7P, 4DNESTAPSPUC, 4DNES4GSP954,

4DNESJIYRA44, 4DNESE3ICNE1). Hi-C contact matrices were generated by tiling the genome into 40kb bins and counting the number of interactions between bins. We refer to these as raw contact matrices.

**Hi-C read alignment and contact matrices:** Reads were aligned to hg19 reference genome using bwa-mem (Li, 2013). Read ends were aligned independently as paired-end model in BWA cannot handle the long insert size of Hi-C reads. Aligned reads were further filtered to keep only the 5' alignment. Read pairs were then manually paired. Read pairs with low mapping quality (MAPQ<sub>j</sub>10) were discarded, and PCR duplicates were removed using Picard tools 1.131 <http://broadinstitute.github.io/picard>. To construct the contact matrices, Hi-C read pairs were assigned to predefined 40Kb genomic bins. Bins with low mapping quality (< 0.8), low GC content (< 0.3), and low fragment length (< 10% of the bin size) were discarded.

### Band Matrices

To make comparisons across individuals, we form band matrices, which are matrices whose columns are all matrix band  $i$  from each sample. A matrix band is a collection of entries in a contact matrix between two loci at a fixed distance. Formally, band  $i$  is the collection of  $j, k$  entries with  $|j - k| + 1 = i$ .

### Log counts per million transformation

We use the logCPM (log counts per million) transformation previous described (Law et al., 2014). Specifically, for a contact matrix  $\mathbb{X}$  we estimate library size  $L$  by the sum of the upper triangular matrix of each of the chromosome specific contact matrices. This discards inter-chromosomal contacts as well as the diagonal of the contact matrix. The logCPM matrix  $\mathbb{Y}$  is defined as

$$Y_{ij} = \log \left( \frac{X_{ij} + 0.5}{L + 1} 10^6 \right)$$

where  $X_{ij}$  refers to element  $i, j$  from the contact matrix  $\mathbb{X}$  and  $L$  is the estimated library size for that matrix. For data normalized using HiCNorm both  $\mathbb{X}$  and  $L$  are not integers.

### ICE

For analyses with ICE, we used an implementation of the algorithm as described in (Fortin, Hansen, 2015), with a tolerance of  $10^{-3}$ . We applied our implementation of ICE to unnormalized Hi-C count matrices. In addition, we also applied the observed-expected transform (Rao et al., 2014) to ICE-transformed data. Because the observed-expected transform removes the decay of distance, to preserve the normalization performed by the transform while still allowing the contact matrix to

exhibit a distance-dependent decay, we defined a back-solve operation. For each matrix band, we compute a mean band by first computing the mean of a given band for each sample, and then the mean of these means. This latter quantity is our band mean. We then multiply each element in each sample for a given band by this mean band value. In this way we allow for the inter-sample normalization to be preserved while re-introducing a distance-based decay.

### HiCNorm

We use HiCNorm (Hu et al., 2012) in Figure 3. To process the data we used an updated implementation (<https://github.com/ren-lab/HiCNorm>). Following HiCNorm normalization, we applied the log counts per million transformation (see above). We then smoothed the contact matrices with a box smoother with a bandwidth of 5 bins; we use HiCRep to choose the bandwidth based on the correlation between technical replicates (T Yang et al., 2017). The bandwidth we select is the same as the bandwidth selected for 40kb resolution Hi-C data in T Yang et al. (2017). Smoothing was performed using the EBImage package (Pau et al., 2010); this is a separate but equivalent implementation to HiCRep.

### BNBC

BNBC has the following components: separate smoothing of each contact matrix, application of the band transformation, quantile normalization on each band matrix and finally application of ComBat on each band matrix.

Following the log counts per million transformation of the raw contact matrices, we smooth individual chromosome matrices using a box smoother with a bandwidth of 5, as selected by the HiCRep approach (T Yang et al., 2017). Each contact matrix and each chromosome is smoothed separately. We next apply the band transformation (see above) and quantile normalize each band matrix separately (Bolstad et al., 2003). Smoothing and quantile normalization is optional in our implementation; these two steps have negligible impact on the performance of BNBC in our experience.

Following quantile normalization we apply ComBat (Johnson et al., 2007) to each band matrix separately. We apply the parametric prior described in Johnson et al. (2007). Prior to applying ComBat, we filter out matrix cells for which the intra-batch variance is zero for all batches. After applying ComBat we set filtered matrix cells to zero. Using ComBat with a batch factor is a variant of regressing out the batch factor for each contact cell, using an Empirical Bayes approach to improve power in small sample situations as well as allowing for variances to differ across the level of the batch factor.

Our implementation of BNBC is available in the `bnbc` R package from the Bioconductor project (Gentleman et

al., 2004; Huber et al., 2015) at <https://www.bioconductor.org/packages/bnbc>.

### Explained variation and smoothed boxplot

To assess unwanted variation for each matrix cell in a contact matrix, we employ a linear mixed model approach. Specifically, we fit a mixed effect model regressing HiC contact strength on batch indicator, with a random effect at the subject level to capture the increased correlation between technical replicates. This model is fit using the R package *varComp* (Qu et al., 2013) and  $R^2$  for this model is calculated using the method of Edwards et al. (2008).

To display  $R^2$  as a function of distance, we first compute a series of box plots of  $R^2$ , one for each band matrix. We extract the summary measures for the box plots (median, 1st and 3rd quantile and 1.5 times the inter-quartile range). We then display these 5 curves, with color fills. Medians are black, 1st and 3rd quartiles are pink and 1.5 times the inter-quartile range are blue.

### A/B compartments from smoothed contact matrices

A/B compartments were originally proposed to be estimated using the first eigenvector of a suitable transform of the contact matrix Lieberman-Aiden et al., 2009. Specifically, the contact matrix was transformed using the observed-expected transformation where each matrix band was divided by its mean. Our contact matrices following application of the log counts per million transform and smoothing are on the log scale. To get A/B compartments from the output of BNBC (Supplementary Figure 8), we exponentiate every entry in the matrix, multiply by  $10^6$ , apply the observed-expected transformation and compute the first eigenvector. Data are then smoothed using a moving-average as done by Fortin, Hansen (2015), standardized to have mean zero and unit variance and Winsorized at the first and third quantiles, then min-max scaled. Finally, we map the transformed eigenvectors into  $(-1, 1)$  via the formula  $e_{i,j} * 2 - 1$ .

### QTL Study

To assess the downstream impact of the different possible normalization schemes, we conducted a study to find genetic variants associated with quantitative Hi-C signal in a given contact matrix cell when observed across 9 replicate-level observations from 5 unrelated individuals (Table 1); we refer to these variants as quantitative trait loci (QTLs). Genotypes were obtained from 1000 genomes (1000 Genomes Project Consortium et al., 2015); a detailed description is available in Gorkin et al. (2019).

As candidate SNPs we consider SNPs for which at least 2 genotypes (i.e. from a variant with alleles A and

B, out of 3 possible genotypes AA, AB, and BB, at least 2 are observed) and each observed genotype has at least two subjects represented (i.e. if AA and AB are observed, at least 2 subjects have the AA genotype and at least 2 subjects have the AB genotype). Furthermore, a candidate SNP for a given contact cell is required to sit in one of the two anchor bins of the contact cell.

For a given Hi-C contact matrix cell, we specifically model the observations of this contact matrix cell, over all 9 replicates from all 5 individuals, using a mixed effect model to account for subject-level correlation in the replicate-level observations. We model the impact of genotype as a fixed dosage effect. We include as covariates the reported ethnicity of each subject (Table 1), as well as the first 3 genetic PCs, computed using SNPRelate (Zheng et al., 2012). P-values were computed by Wald test on the fixed effect coefficient for genotype, with degrees of freedom estimated via Satterthwaite's method, as implemented in Kuznetsova et al. (2015) and Bates et al. (2015).

We conducted this study using all Hi-C matrix cells for chromosome 22 for all Hi-C matrix bins separated by no more than 700 40kb bins (2.8e7bp). We required each variant we tested to have in-sample at least 2 unique genotypes and at least 2 observations in at least 2 unique genotypes. These criteria resulted in 1,111,408 tests involving 22,593 unique SNPs and 872 unique 40kb bins on chr22.

### Acknowledgements

*Funding:* Research reported in this publication was supported by National Institute of Diabetes and Digestive and Kidney Diseases, the National Cancer Institute and the National Institute of General Medicine of the National Institutes of Health under award numbers 54DK107977, U24CA180996 and R01GM121459. KFB was supported by the Maryland Genetics, Epidemiology and Medicine (MD-GEM) program. DUG was supported by funding from the A.P. Giannini Foundation and the San Diego Institutional Research and Academic Career Development Award (IRACDA) program.

*Disclaimer:* The content is solely the responsibility of the authors and does not necessarily represent the official views of the National Institutes of Health.

*Conflict of Interest:* None declared.

### Bibliography

- 1000 Genomes Project Consortium, Auton A, Brooks LD, Durbin RM, Garrison EP, Kang HM, Korbel JO, Marchini JL, McCarthy S, McVean GA, et al. (2015). A global reference for human genetic variation. *Nature* 526.7571: 68–74. DOI: [10.1038/nature15393](https://doi.org/10.1038/nature15393).
- Abdennur N, Mirny L (2019). Cooler: scalable storage for Hi-C data and other genomically-labeled arrays. *Bioinformatics*. DOI: [10.1093/bioinformatics/btz540](https://doi.org/10.1093/bioinformatics/btz540).



- Ay F, Bailey TL, Noble WS (2014). Statistical confidence estimation for Hi-C data reveals regulatory chromatin contacts. *Genome Research* **24**: 999–1011. DOI: [10.1101/gr.160374.113](https://doi.org/10.1101/gr.160374.113).
- Bates D, Mächler M, Bolker B, Walker S (2015). Fitting Linear Mixed-Effects Models Using lme4. *Journal of Statistical Software* **67**: 1–48. DOI: [10.18637/jss.v067.i01](https://doi.org/10.18637/jss.v067.i01).
- Bell JT, Pai AA, Pickrell JK, Gaffney DJ, Pique-Regi R, Degner JF, Gilad Y, Pritchard JK (2011). DNA methylation patterns associate with genetic and gene expression variation in HapMap cell lines. *Genome Biology* **12**: R10. DOI: [10.1186/gb-2011-12-1-r10](https://doi.org/10.1186/gb-2011-12-1-r10).
- Bolstad BM, Irizarry RA, Astrand M, Speed TP (2003). A comparison of normalization methods for high density oligonucleotide array data based on variance and bias. *Bioinformatics* **19**: 185–193. DOI: [10.1093/bioinformatics/19.2.185](https://doi.org/10.1093/bioinformatics/19.2.185).
- Carty M, Zamparo L, Sahin M, González A, Pelossof R, Elemento O, Leslie CS (2017). An integrated model for detecting significant chromatin interactions from high-resolution Hi-C data. *Nature Communications* **8**: 15454. DOI: [10.1038/ncomms15454](https://doi.org/10.1038/ncomms15454).
- Chaisson MJP, Sanders AD, Zhao X, Malhotra A, Porubsky D, Rausch T, Gardner EJ, Rodriguez OL, Guo L, Collins RL, et al. (2019). Multi-platform discovery of haplotype-resolved structural variation in human genomes. *Nature Communications* **10**: 1784. DOI: [10.1038/s41467-018-08148-z](https://doi.org/10.1038/s41467-018-08148-z).
- Choy E, Yelensky R, Bonakdar S, Plenge RM, Saxena R, De Jager PL, Shaw SY, Wolfish CS, Slavik JM, Cotsapas C, et al. (2008). Genetic analysis of human traits in vitro: drug response and gene expression in lymphoblastoid cell lines. *PLOS Genetics* **4**: e1000287. DOI: [10.1371/journal.pgen.1000287](https://doi.org/10.1371/journal.pgen.1000287).
- Davies JOJ, Oudelaar AM, Higgs DR, Hughes JR (2017). How best to identify chromosomal interactions: a comparison of approaches. *Nature Methods* **14**: 125–134. DOI: [10.1038/nmeth.4146](https://doi.org/10.1038/nmeth.4146).
- Degner JF, Pai AA, Pique-Regi R, Veyrieras JB, Gaffney DJ, Pickrell JK, De Leon S, Michelini K, Lewellen N, Crawford GE, et al. (2012). DNase I sensitivity QTLs are a major determinant of human expression variation. *Nature* **482**: 390–394. DOI: [10.1038/nature10808](https://doi.org/10.1038/nature10808).
- Dekker J, Marti-Renom MA, Mirny LA (2013). Exploring the three-dimensional organization of genomes: interpreting chromatin interaction data. *Nature Reviews Genetics* **14**: 390–403. DOI: [10.1038/nrg3454](https://doi.org/10.1038/nrg3454).
- Dixon JR, Selvaraj S, Yue F, Kim A, Li Y, Shen Y, Hu M, Liu JS, Ren B (2012). Topological domains in mammalian genomes identified by analysis of chromatin interactions. *Nature* **485**: 376–380. DOI: [10.1038/nature11082](https://doi.org/10.1038/nature11082).
- Edwards LJ, Muller KE, Wolfinger RD, Qaqish BF, Schabenberger O (2008). An R2 statistic for fixed effects in the linear mixed model. *Statistics in Medicine* **27**: 6137–6157. DOI: [10.1002/sim.3429](https://doi.org/10.1002/sim.3429).
- Fortin JP, Hansen KD (2015). Reconstructing A/B compartments as revealed by Hi-C using long-range correlations in epigenetic data. *Genome Biology* **16**: 180. DOI: [10.1186/s13059-015-0741-y](https://doi.org/10.1186/s13059-015-0741-y).
- Fortin JP, Labbe A, Lemire M, Zanke BW, Hudson TJ, Fertig EJ, Greenwood CM, Hansen KD (2014). Functional normalization of 450k methylation array data improves replication in large cancer studies. *Genome Biology* **15**: 503. DOI: [10.1186/s13059-014-0503-2](https://doi.org/10.1186/s13059-014-0503-2).
- Gagnon-Bartsch JA, Speed TP (2012). Using control genes to correct for unwanted variation in microarray data. *Biostatistics* **13**: 539–552. DOI: [10.1093/biostatistics/kxr034](https://doi.org/10.1093/biostatistics/kxr034).
- Gentleman RC, Carey VJ, Bates DM, Bolstad B, Dettling M, Dudoit S, Ellis B, Gautier L, Ge Y, Gentry J, et al. (2004). Bioconductor: open software development for computational biology and bioinformatics. *Genome Biology* **5**: R80. DOI: [10.1186/gb-2004-5-10-r80](https://doi.org/10.1186/gb-2004-5-10-r80).
- Gorkin DU, Qiu Y, Hu M, Fletez-Brant K, Liu T, Schmitt AD, Noor A, Chiou J, Gaulton KJ, Sebat J, et al. (2019). Common DNA sequence variation influences 3-dimensional conformation of the human genome. *Genome Biology* **20**: 255. DOI: [10.1186/s13059-019-1855-4](https://doi.org/10.1186/s13059-019-1855-4).
- Haarhuis JHI, Weide RH van der, Blomen VA, Yáñez-Cuna JO, Amendola M, Ruiten MS van, Krijger PHL, Teunissen H, Medema RH, Steensel B van, et al. (2017). The Cohesin Release Factor WAPL Restricts Chromatin Loop Extension. *Cell* **169**: 693–707.e14. DOI: [10.1016/j.cell.2017.04.013](https://doi.org/10.1016/j.cell.2017.04.013).
- Hu M, Deng K, Selvaraj S, Qin Z, Ren B, Liu JS (2012). HiCNorm: removing biases in Hi-C data via Poisson regression. *Bioinformatics* **28**: 3131–3133. DOI: [10.1093/bioinformatics/bts570](https://doi.org/10.1093/bioinformatics/bts570).
- Huber W, Carey VJ, Gentleman R, Anders S, Carlson M, Carvalho BS, Bravo HC, Davis S, Gatto L, Girke T, et al. (2015). Orchestrating high-throughput genomic analysis with Bioconductor. *Nature Methods* **12**: 115–121. DOI: [10.1038/nmeth.3252](https://doi.org/10.1038/nmeth.3252).
- Imakaev M, Fudenberg G, McCord RP, Naumova N, Goloborodko A, Lajoie BR, Dekker J, Mirny LA (2012). Iterative correction of Hi-C data reveals hallmarks of chromosome organization. *Nature Methods* **9**: 999–1003. DOI: [10.1038/nmeth.2148](https://doi.org/10.1038/nmeth.2148).
- International HapMap Consortium (2003). The International HapMap Project. *Nature* **426**: 789–796. DOI: [10.1038/nature02168](https://doi.org/10.1038/nature02168).
- Johnson WE, Li C, Rabinovic A (2007). Adjusting batch effects in microarray expression data using empirical Bayes methods. *Biostatistics* **8**: 118–127. DOI: [10.1093/biostatistics/kxj037](https://doi.org/10.1093/biostatistics/kxj037).
- Kasowski M, Kyriazopoulou-Panagiotopoulou S, Grubert F, Zaugg JB, Kundaje A, Liu Y, Boyle AP, Zhang QC, Zakharia F, Spacek DV, et al. (2013). Extensive variation in chromatin states across humans. *Science* **342**: 750–752. DOI: [10.1126/science.1242510](https://doi.org/10.1126/science.1242510).
- Kilpinen H, Waszak SM, Gschwind AR, Raghav SK, Witwicki RM, Orioli A, Migliavacca E, Wiederkehr M, Gutierrez-Arcelus M, Panousis NI, et al. (2013). Coordinated effects of sequence variation on DNA binding, chromatin structure, and transcription. *Science* **342**: 744–747. DOI: [10.1126/science.1242463](https://doi.org/10.1126/science.1242463).
- Knight PA, Ruiz D (2013). A fast algorithm for matrix balancing. *IMA Journal of Numerical Analysis* **33**: 1029–1047. DOI: [10.1093/imanum/drs019](https://doi.org/10.1093/imanum/drs019).
- Kuznetsova A, Brockhoff PB, Christensen RHB (2015). Package ‘lmerTest’. *R package version 2*.

- Law CW, Chen Y, Shi W, Smyth GK (2014). voom: Precision weights unlock linear model analysis tools for RNA-seq read counts. *Genome Biology* **15**: R29. DOI: [10.1186/gb-2014-15-2-r29](https://doi.org/10.1186/gb-2014-15-2-r29).
- Leek JT (2014). svaseq: removing batch effects and other unwanted noise from sequencing data. *Nucleic Acids Research* **42**: gku864. DOI: [10.1093/nar/gku864](https://doi.org/10.1093/nar/gku864).
- Leek JT, Scharpf RB, Bravo HC, Simcha D, Langmead B, Johnson WE, Geman D, Baggerly K, Irizarry RA (2010). Tackling the widespread and critical impact of batch effects in high-throughput data. *Nature Reviews Genetics* **11**: 733–739. DOI: [10.1038/nrg2825](https://doi.org/10.1038/nrg2825).
- Leek JT, Storey JD (2007). Capturing heterogeneity in gene expression studies by surrogate variable analysis. *PLoS Genetics* **3**: 1724–1735. DOI: [10.1371/journal.pgen.0030161](https://doi.org/10.1371/journal.pgen.0030161).
- Leek JT, Storey JD (2008). A general framework for multiple testing dependence. *PNAS* **105**: 18718–18723. DOI: [10.1073/pnas.0808709105](https://doi.org/10.1073/pnas.0808709105).
- Li H (2013). Aligning sequence reads, clone sequences and assembly contigs with BWA-MEM. *arXiv*: 1303.3997.
- Lieberman-Aiden E, Berkum NL van, Williams L, Imakaev M, Ragoczy T, Telling A, Amit I, Lajoie BR, Sabo PJ, Dorschner MO, et al. (2009). Comprehensive mapping of long-range interactions reveals folding principles of the human genome. *Science* **326**: 289–293. DOI: [10.1126/science.1181369](https://doi.org/10.1126/science.1181369).
- Lun ATL, Smyth GK (2015). diffHic: a Bioconductor package to detect differential genomic interactions in Hi-C data. *BMC Bioinformatics* **16**: 258. DOI: [10.1186/s12859-015-0683-0](https://doi.org/10.1186/s12859-015-0683-0).
- McVicker G, Geijn B van de, Degner JF, Cain CE, Banovich NE, Raj A, Lewellen N, Myrthil M, Gilad Y, Pritchard JK (2013). Identification of genetic variants that affect histone modifications in human cells. *Science* **342**: 747–749. DOI: [10.1126/science.1242429](https://doi.org/10.1126/science.1242429).
- Montgomery SB, Sammeth M, Gutierrez-Arcelus M, Lach RP, Ingle C, Nisbett J, Guigo R, Dermitzakis ET (2010). Transcriptome genetics using second generation sequencing in a Caucasian population. *Nature* **464**: 773–777. DOI: [10.1038/nature08903](https://doi.org/10.1038/nature08903).
- Nora EP, Lajoie BR, Schulz EG, Giorgetti L, Okamoto I, Servant N, Piolot T, Berkum NL van, Meisig J, Sedat J, et al. (2012). Spatial partitioning of the regulatory landscape of the X-inactivation centre. *Nature* **485**: 381–385. DOI: [10.1038/nature11049](https://doi.org/10.1038/nature11049).
- Pau G, Fuchs F, Sklyar O, Boutros M, Huber W (2010). EBImage – an R package for image processing with applications to cellular phenotypes. *Bioinformatics* **26**: 979–981. DOI: [10.1093/bioinformatics/btq046](https://doi.org/10.1093/bioinformatics/btq046).
- Pickrell JK, Marioni JC, Pai AA, Degner JF, Engelhardt BE, Nkadori E, Veyrieras JB, Stephens M, Gilad Y, Pritchard JK (2010). Understanding mechanisms underlying human gene expression variation with RNA sequencing. *Nature* **464**: 768–772. DOI: [10.1038/nature08872](https://doi.org/10.1038/nature08872).
- Qu L, Guennel T, Marshall SL (2013). Linear score tests for variance components in linear mixed models and applications to genetic association studies. *Biometrics* **69**: 883–892. DOI: [10.1111/biom.12095](https://doi.org/10.1111/biom.12095).
- Rao SSP, Huntley MH, Durand NC, Stamenova EK, Bochkov ID, Robinson JT, Sanborn AL, Machol I, Omer AD, Lander ES, et al. (2014). A 3D map of the human genome at kilobase resolution reveals principles of chromatin looping. *Cell* **159**: 1665–1680. DOI: [10.1016/j.cell.2014.11.021](https://doi.org/10.1016/j.cell.2014.11.021).
- Risso D, Ngai J, Speed TP, Dudoit S (2014). Normalization of RNA-seq data using factor analysis of control genes or samples. *Nature Biotechnology* **32**: 896–902. DOI: [10.1038/nbt.2931](https://doi.org/10.1038/nbt.2931).
- Schmitt AD, Hu M, Ren B (2016). Genome-wide mapping and analysis of chromosome architecture. *Nat. Rev. Mol. Cell Biol.* **17**: 743–755. DOI: [10.1038/nrm.2016.104](https://doi.org/10.1038/nrm.2016.104).
- Sexton T, Yaffe E, Kenigsberg E, Bantignies F, Leblanc B, Hoichman M, Parrinello H, Tanay A, Cavalli G (2012). Three-dimensional folding and functional organization principles of the Drosophila genome. *Cell* **148**: 458–472. DOI: [10.1016/j.cell.2012.01.010](https://doi.org/10.1016/j.cell.2012.01.010).
- Stansfield JC, Cresswell KG, Dozmorov MG (2019). multiHiC-compare: joint normalization and comparative analysis of complex Hi-C experiments. *Bioinformatics* **35**: 2916–2923. DOI: [10.1093/bioinformatics/btz048](https://doi.org/10.1093/bioinformatics/btz048).
- Stansfield JC, Cresswell KG, Vladimirov VI, Dozmorov MG (2018). HiCcompare: an R-package for joint normalization and comparison of Hi-C datasets. *BMC Bioinformatics* **19**: 279. DOI: [10.1186/s12859-018-2288-x](https://doi.org/10.1186/s12859-018-2288-x).
- Stark AL, Zhang W, Zhou T, O'Donnell PH, Beiswanger CM, Huang RS, Cox NJ, Dolan ME (2010). Population differences in the rate of proliferation of international HapMap cell lines. *American Journal of Human Genetics* **87**: 829–833. DOI: [10.1016/j.ajhg.2010.10.018](https://doi.org/10.1016/j.ajhg.2010.10.018).
- Stegle O, Parts L, Durbin R, Winn J (2010). A Bayesian framework to account for complex non-genetic factors in gene expression levels greatly increases power in eQTL studies. *PLoS Computational Biology* **6**: e1000770. DOI: [10.1371/journal.pcbi.1000770](https://doi.org/10.1371/journal.pcbi.1000770).
- Stranger BE, Nica AC, Forrest MS, Dimas A, Bird CP, Beazley C, Ingle CE, Dunning M, Flicek P, Koller D, et al. (2007). Population genomics of human gene expression. *Nature Genetics* **39**: 1217–1224. DOI: [10.1038/ng2142](https://doi.org/10.1038/ng2142).
- Vernimmen D, Bickmore WA (2015). The Hierarchy of Transcriptional Activation: From Enhancer to Promoter. *Trends in Genetics* **31**: 696–708. DOI: [10.1016/j.tig.2015.10.004](https://doi.org/10.1016/j.tig.2015.10.004).
- Vidal E, Dily F le, Quilez J, Stadhouders R, Cuartero Y, Graf T, Marti-Renom MA, Beato M, Fillion GJ (2018). OneD: increasing reproducibility of Hi-C samples with abnormal karyotypes. *Nucleic Acids Research*. DOI: [10.1093/nar/gky064](https://doi.org/10.1093/nar/gky064).
- Wit E de, Laat W de (2012). A decade of 3C technologies: insights into nuclear organization. *Genes & Development* **26**: 11–24. DOI: [10.1101/gad.179804.111](https://doi.org/10.1101/gad.179804.111).
- Yaffe E, Tanay A (2011). Probabilistic modeling of Hi-C contact maps eliminates systematic biases to characterize global chromosomal architecture. *Nature Genetics* **43**: 1059–1065. DOI: [10.1038/ng.947](https://doi.org/10.1038/ng.947).
- Yan KK, Gürkan Yardımcı G, Yan C, Noble WS, Gerstein M (2017). HiC-Spector: A matrix library for spectral and reproducibility analysis of Hi-C contact maps. *Bioinformatics* **33**: 2199–2201. DOI: [10.1093/bioinformatics/btx152](https://doi.org/10.1093/bioinformatics/btx152).
- Yang T, Zhang F, Yardımcı GG, Song F, Hardison RC, Noble WS, Yue F, Li Q (2017). HiCRep: assessing the reproducibility of Hi-C data using a stratum-adjusted correlation coefficient. *Genome Research* **27**: 1939–1949. DOI: [10.1101/gr.220640.117](https://doi.org/10.1101/gr.220640.117).

- Yang YH, Dudoit S, Luu P, Lin DM, Peng V, Ngai J, Speed TP (2002). Normalization for cDNA microarray data: a robust composite method addressing single and multiple slide systematic variation. *Nucleic Acids Research* **30**: e15.
- Yardımcı GG, Ozadam H, Sauria MEG, Ursu O, Yan KK, Yang T, Chakraborty A, Kaul A, Lajoie BR, Song F, et al. (2019). Measuring the reproducibility and quality of Hi-C data. *Genome Biology* **20**: 57. DOI: [10.1186/s13059-019-1658-7](https://doi.org/10.1186/s13059-019-1658-7).
- Zheng X, Levine D, Shen J, Gogarten SM, Laurie C, Weir BS (2012). A high-performance computing toolset for relatedness and principal component analysis of SNP data. *Bioinformatics* **28**: 3326–3328. DOI: [10.1093/bioinformatics/bts606](https://doi.org/10.1093/bioinformatics/bts606).
